# Supplementary material for: Influence of hypomagnetic field on the heartbeat in zebrafish embryos
Source: Front Physiol. 2022 Oct 21;13:1040083. doi: 10.3389/fphys.2022.1040083 (PMC9634549; doi:10.3389/fphys.2022.1040083)
Supplement: Supplementary file 3 [file Table1.XLSX]

## Sheet: heart_rate
Control (unmodified geomagnetic field), 16 h / 8 h light-dark cycle
replication	fish#	hpf
		48	52	56	60	64	68	72	76	80	84	88	92	96	100	104	108	112	116
		local time
		09:00:00	13:00:00	17:00:00	21:00:00	01:00:00	05:00:00	09:00:00	13:00:00	17:00:00	21:00:00	01:00:00	05:00:00	09:00:00	13:00:00	17:00:00	21:00:00	01:00:00	05:00:00
repl1	1	110.662	121.059	130.823	136.339	138.622	140.353	147.676	164.715	163.878	162.209	161.526	164.507	172.848	177.695	171.691	159.39	157.588	161.349
repl1	2	117.707	125.985	129.285	131.846	145.149	153.956	165.102	174.529	170.218	161.893	159.368	167.097	175.915	179.11	181.853	172.045	165.431	162.439
repl2	3	125.487	131.736	148.341	144.048	145.893	150.056	158.582	174.029	174.292	170.562	165.847	168.333	181.002	178.577	178.019	174.706	169.161	170.395
repl2	4	121.022	129.634	147.957	152.936	149.223	152.369	163.571	170.458	166.093	159.139	168.362	166.034	179.854	178.508	183.883	177.118	172.239	164.35
repl3	5	130.006	135.385	142.271	151.393	150.494	156.104	165.393	162.83	172.019	178.672	164.733	168.92	187.435	190.748	191.34	181.308	179.036	181.131
repl3	6	124.918	133.183	148.36	155.15	150.008	152.473	159.119	169.394	167.832	164.3	161.69	170.974	178.019	171.519	175.394	174.535	165.57	174.05
repl4	7	111.814	124.519	130.745	133.093	145.792	151.826	158.288	167.122	163.469	158.756	152.003	167.678	185.538	179.33	182.42	174.535	164.398	166.707
repl4	8	127.072	130.742	137.439	143.75	148.321	155.245	162.83	172.861	169.298	161.22	158.341	165.057	176.011	188.409	183.331	181.852	176.039	179.457
	averaged	121.086	129.03	139.403	143.569	146.688	151.548	160.07	169.492	168.388	164.594	161.484	167.325	179.578	180.487	180.992	174.436	168.683	169.985
Hypomagnetic field, 16 h / 8 h light-dark cycle
replication	fish#	hpf
		48	52	56	60	64	68	72	76	80	84	88	92	96	100	104	108	112	116
		local time
		09:00:00	13:00:00	17:00:00	21:00:00	01:00:00	05:00:00	09:00:00	13:00:00	17:00:00	21:00:00	01:00:00	05:00:00	09:00:00	13:00:00	17:00:00	21:00:00	01:00:00	05:00:00
repl1	1	130.808	132.657	146.894	151.818	147.448	155.623	158.247	169.501	168.265	171.519	162.523	169.347	189.689	198.61	180.268	185.246	179.763	182.89
repl1	2	131.522	129.546	149.291	160.974	163.475	166.505	163.234	167.329	172.331	175.217	181.068	181.453	181.451	189.496	185.747	188.249	181.792	179.294
repl2	3	131.993	138.399	147.222	158.565	157.964	159.552	161.245	180.567	184.063	179.198	172.522	164.245	188.459	185.135	192.349	188.09	182.251	191.176
repl2	4	139.425	145.435	152.066	160.024	162.499	161.441	172.455	199.457	192.943	185.542	179.804	187.324	191.968	200.171	205.231	189.86	200.82	204.882
repl3	5	121.429	133.45	147.084	152.454	158.093	154.608	162.923	194.66	199.324	171.919	172.31	166.336	183.451	184.752	188.728	173.406	169.354	172.495
repl3	6	125.524	129.623	148.702	154.312	154.946	158.559	148.226	168.227	174.034	168.036	159.29	164.068	172.034	192.503	180.102	175.145	179.444	180.751
repl4	7	127.852	135.655	147.297	149.411	152.152	149.391	163.475	166.279	180.435	182.049	172.055	175.473	185.259	204.594	199.83	187.201	171.998	168.289
repl4	8	123.77	127.6	144.545	146.904	155.131	153.311	159.835	168.973	166.429	172.392	170.934	171.637	178.571	191.509	181.64	182.097	177.509	184.496
	averaged	129.04	134.046	147.888	154.308	156.463	157.374	161.205	176.874	179.728	175.734	171.313	172.486	183.86	193.346	189.237	183.662	180.366	183.034
Unmodified geomagnetic field, constant light
replication	fish#	hpf
		48	52	56	60	64	68	72	76	80	84	88	92	96	100	104	108	112	116
		local time
		09:00:00	13:00:00	17:00:00	21:00:00	01:00:00	05:00:00	09:00:00	13:00:00	17:00:00	21:00:00	01:00:00	05:00:00	09:00:00	13:00:00	17:00:00	21:00:00	01:00:00	05:00:00
repl1	1	140.541	142.065	156.431	151.819	158.311	157.488	169.109	179.151	184.42	172.234	165.254	175.705	187.598	177.028	181.208	176.67	182.104	177.898
repl1	2	133.687	134.976	148.607	149.378	158.714	154.601	168.712	188.482	192.261	181.628	172.358	183.106	191.95	188.088	186.874	163.636	169.6	178.533
repl2	3	129.032	144.724	159.044	151.142	158.456	161.877	171.875	184.279	184.168	177.449	172.594	177.215	186.722	178.279	185.185	152.778	166.667	166.395
repl2	4	111.406	129.73	150.692	145.416	148.813	151.468	165.563	182.609	183.575	188.72	177.419	173.593	185.841	188.13	188.13	164.47	171.701	169.456
repl3	5	122.324	128.637	138.01	136.709	143.878	146.341	158.94	173.41	173.319	166.579	157.463	173.959	171.806	175.182	168.028	158.32	160.63	157.563
repl3	6	130.567	135.733	154.022	147.768	154.937	155.602	169.419	185.924	185.205	174.909	182.114	183.801	199.017	197.842	195.228	161.464	164.384	161.905
repl4	7	128.9	138.583	157.895	150.847	158.456	158.73	169.239	184.383	191.603	180.889	176.836	179.872	195.789	200	188.482	165.316	171.975	176.565
repl4	8	120.494	131.73	147.721	149.695	161.013	161.574	170.433	189.175	180.354	175.906	162.754	175.732	190.88	176.471	174.497	166.842	161.905	168.432
	averaged	127.119	135.772	151.553	147.847	155.322	155.96	167.911	183.427	184.363	177.289	170.849	177.873	188.7	185.127	183.454	163.687	168.621	169.593
Hypomagnetic field, constant light
replication	fish#	hpf
		48	52	56	60	64	68	72	76	80	84	88	92	96	100	104	108	112	116
		local time
		09:00:00	13:00:00	17:00:00	21:00:00	01:00:00	05:00:00	09:00:00	13:00:00	17:00:00	21:00:00	01:00:00	05:00:00	09:00:00	13:00:00	17:00:00	21:00:00	01:00:00	05:00:00
repl1	1	142.48	159.918	168.7	168.963	172.249	177.122	182.773	196.033	205.479	195.584	187.793	184.805	199.367	196.466	205.714	183.23	169.659	168.601
repl1	2	124.923	158.061	173.581	176.376	171.696	178.311	180.38	194.92	196.036	202.725	197.279	188.679	193.448	194.175	203.975	171.045	173.355	172.924
repl2	3	146.419	156.58	173.219	160.968	161.392	168.076	184.358	191.976	193.214	186.316	196.986	191.184	201.064	199.789	207.226	193.074	178.497	164.969
repl2	4	153.453	170.094	177.009	173.643	174.49	177.478	188.498	198.697	203.498	187.696	185.09	200.108	200.732	187.005	196.668	167.292	162.766	154.839
repl3	5	132.58	149.378	158.859	159.875	163.077	167.987	174.204	183.182	191.038	188.545	176.935	181.167	193.651	190.476	198.4	173.271	180.393	181.11
repl3	6	151.668	161.407	166.924	170.992	172.815	176.991	193.029	209.081	216.247	214.397	213.389	197.269	205.457	199.896	198.217	168.395	172.432	171.334
repl4	7	158.549	170.079	175.295	167.81	169.545	171.975	182.32	193.753	203.549	195.519	191.591	195.071	198.4	200.743	193.952	177.051	160.686	161.29
repl4	8	144.806	157.991	165.138	170.992	170.455	174.334	182.781	196.568	204.743	203.704	191.753	192.746	206.563	184.567	189.374	161.117	158.109	172.865
	averaged	144.36	160.439	169.841	168.703	169.465	174.034	183.543	195.526	201.726	196.811	192.602	191.379	199.835	194.14	199.191	174.309	169.487	168.492

## Sheet: cosinor
	initial data					deternded data (48-116 hpf)					deternded data (72-116 hpf)
	Geomagnetic field, 16 h / 8 h	Hypomagnetic field, 16 h / 8 h	Geomagnetic field, constant light	Hypomagnetic field, constant light		Geomagnetic field, 16 h / 8 h	Hypomagnetic field, 16 h / 8 h	Geomagnetic field, constant light	Hypomagnetic field, constant light		Geomagnetic field, 16 h / 8 h	Hypomagnetic field, 16 h / 8 h	Geomagnetic field, constant light	Hypomagnetic field, constant light
09:00:00	121.086	129.04	127.119	144.36		145.665	155.488	147.002	156.356		165.75	169.745	167.911	172.642
13:00:00	129.03	134.046	135.772	160.439		150.718	157.382	153.316	171.024		174.14	183.861	183.427	186.607
17:00:00	139.403	147.888	151.553	169.841		158.198	168.113	166.757	179.014		172.002	185.163	184.363	194.788
21:00:00	143.569	154.308	147.847	168.703		159.473	171.421	160.712	176.465		167.176	179.616	177.289	191.856
01:00:00	146.688	156.463	155.322	169.465		159.7	170.465	165.848	175.816		163.033	173.642	170.849	189.629
05:00:00	151.548	157.374	155.96	174.034		161.669	168.264	164.147	178.974		167.841	173.262	177.873	190.388
09:00:00	160.07	161.205	167.911	183.543		167.299	168.984	173.759	187.071		179.061	183.084	188.7	200.826
13:00:00	169.492	176.874	183.427	195.526		173.83	181.541	186.935	197.643		178.938	191.017	185.127	197.113
17:00:00	168.388	179.728	184.363	201.726		169.833	181.284	185.533	202.431		178.41	185.355	183.454	204.146
21:00:00	164.594	175.734	177.289	196.811		163.148	174.178	176.12	196.105		170.822	178.227	163.687	181.247
01:00:00	161.484	171.313	170.849	192.602		157.146	166.646	167.34	190.485		164.036	173.379	168.621	178.406
05:00:00	167.325	172.486	177.873	191.379		160.096	164.707	172.025	187.85		164.305	174.494	169.593	179.393
09:00:00	179.578	183.86	188.7	199.835		169.457	172.97	180.513	194.895
13:00:00	180.487	193.346	185.127	194.14		167.475	179.344	174.601	187.788
17:00:00	180.992	189.237	183.454	199.191		165.087	172.123	170.589	191.428
21:00:00	174.436	183.662	163.687	174.309		155.641	163.437	148.482	165.136
01:00:00	168.683	180.366	168.621	169.487		146.996	157.03	151.077	158.902
05:00:00	169.985	183.034	169.593	168.492		145.406	156.586	149.71	156.495
cosinor analysis (24 h rhythm) for 48-116 hpf													cosinor analysis (24 h rhythm) for 72-116 hpf
Control (unmodified geomagnetic field), 16 h / 8 h light-dark cycle											Control (unmodified geomagnetic field), 16 h / 8 h light-dark cycle
				Mesor	159.824												Mesor	170.459
				Amplitude	5.24136												Amplitude	6.63401
				Acrophase (hours, decimal)	14.5719												Acrophase (hours, decimal)	13.962
				Bathyphase (hours, decimal)	2.57188576000 or 26.57188576000												Bathyphase (hours, decimal)	1.96195343000 or 25.96195343000
				Zero-amplitude test													Zero-amplitude test
				Df1 (ndf, numerator)	2												Df1 (ndf, numerator)	2
				Df2 (ddf, denominator)	15												Df2 (ddf, denominator)	9
				F-value	1.88868												F-value	8.78988
				P-value	0.18553												P-value	0.00765
Hypomagnetic field, 16 h / 8 h light-dark cycle											Hypomagnetic field, 16 h / 8 h light-dark cycle
				Mesor	168.331												Mesor	179.237
				Amplitude	5.66571												Amplitude	7.31778
				Acrophase (hours, decimal)	16.1807												Acrophase (hours, decimal)	15.2147
				Bathyphase (hours, decimal)	4.18074217000 or 28.18074217000												Bathyphase (hours, decimal)	3.21468942000 or 27.21468942000
				Zero-amplitude test													Zero-amplitude test
				Df1 (ndf, numerator)	2												Df1 (ndf, numerator)	2
				Df2 (ddf, denominator)	15												Df2 (ddf, denominator)	9
				F-value	2.54992												F-value	10.2342
				P-value	0.11136												P-value	0.00481
Geomagnetic field, constant light											Geomagnetic field, constant light
				Mesor	166.359												Mesor	176.741
				Amplitude	6.65591												Amplitude	7.87575
				Acrophase (hours, decimal)	14.1804												Acrophase (hours, decimal)	13.3305
				Bathyphase (hours, decimal)	2.18040410000 or 26.18040410000												Bathyphase (hours, decimal)	1.33051614000 or 25.33051614000
				Zero-amplitude test													Zero-amplitude test
				Df1 (ndf, numerator)	2												Df1 (ndf, numerator)	2
				Df2 (ddf, denominator)	15												Df2 (ddf, denominator)	9
				F-value	1.31507												F-value	4.28591
				P-value	0.29769												P-value	0.04925
Hypomagnetic field, constant light											Hypomagnetic field, constant light
				Mesor	180.771												Mesor	188.92
				Amplitude	7.83318												Amplitude	6.55828
				Acrophase (hours, decimal)	15.4636												Acrophase (hours, decimal)	15.621
				Bathyphase (hours, decimal)	3.46357609000 or 27.46357609000												Bathyphase (hours, decimal)	3.62097758000 or 27.62097758000
				Zero-amplitude test													Zero-amplitude test
				Df1 (ndf, numerator)	2												Df1 (ndf, numerator)	2
				Df2 (ddf, denominator)	15												Df2 (ddf, denominator)	9
				F-value	1.36433												F-value	1.53032
				P-value	0.28551												P-value	0.26787
